# Supplementary material for: Te-rP-C Anodes Prepared Using a Scalable Milling Process for High-Performance Lithium-Ion Batteries
Source: MDPI journal article supplement (doi:10.3390/mi14122156), 2023-11-25
Supplement: s1 [file s1]

# Supplementary Materials: Te-rP-C Anodes Prepared Using a Scalable Milling Process for High-Performance Lithium-Ion Batteries

Woo Seok Choi, Minseo Kim and Il Tae Kim \*

Department of Chemical and Biological Engineering, Gachon University,  
Seongnam-si 13120, Republic of Korea; polonium04@naver.com (W.S.C.);  
minxissh@gachon.ac.kr (M.K.)

\* Correspondence: itkim@gachon.ac.kr; Tel.: +82-31-750-8835; Fax: +82-31-750-5363

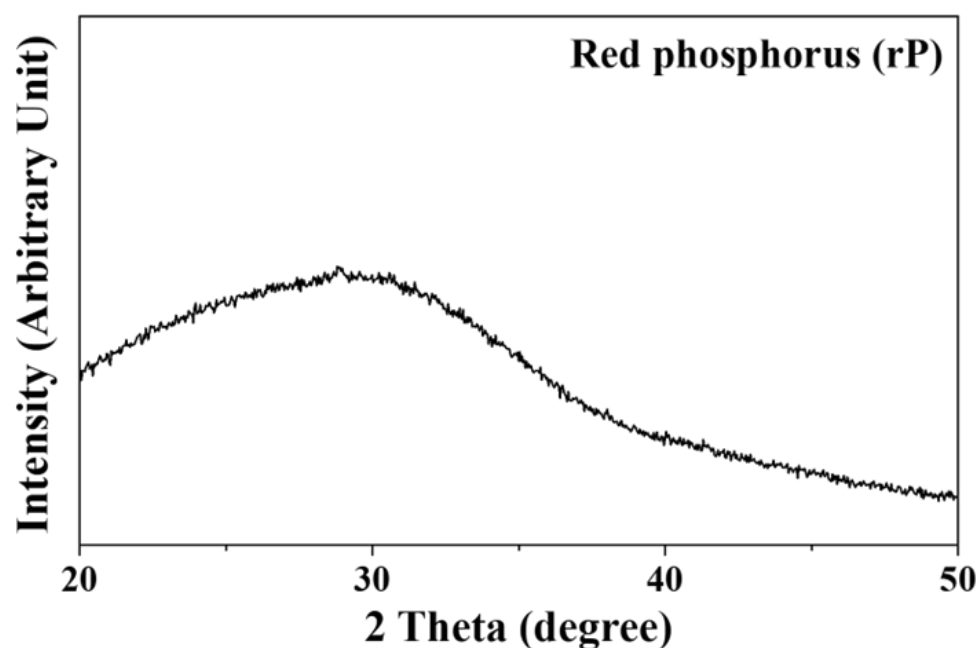

Figure S1. XRD pattern of rP.

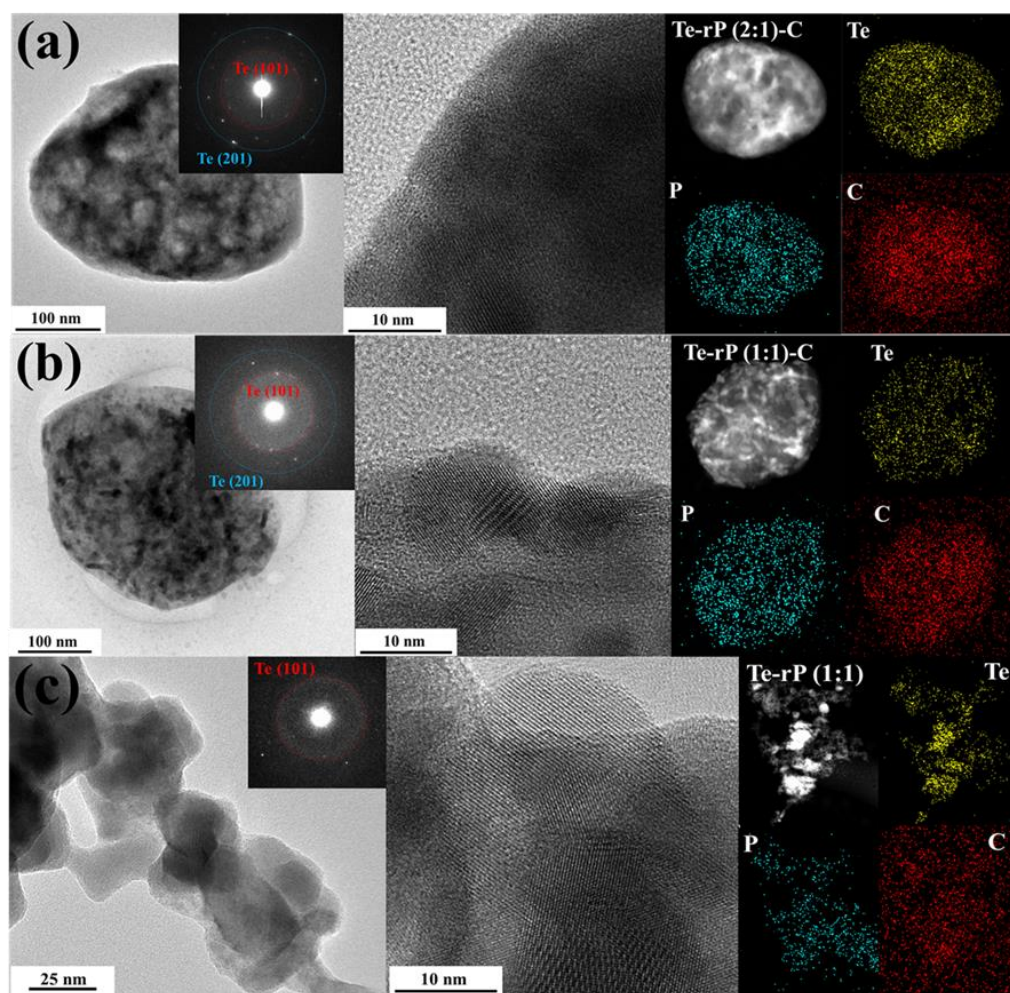

**Figure S2.** TEM images; insets show the SAED pattern, HRTEM image, and elemental mapping images of (a) Te-rP (1:2)-C, (b) Te-rP (1:1)-C, and (c) Te-rP (1:1) composites.

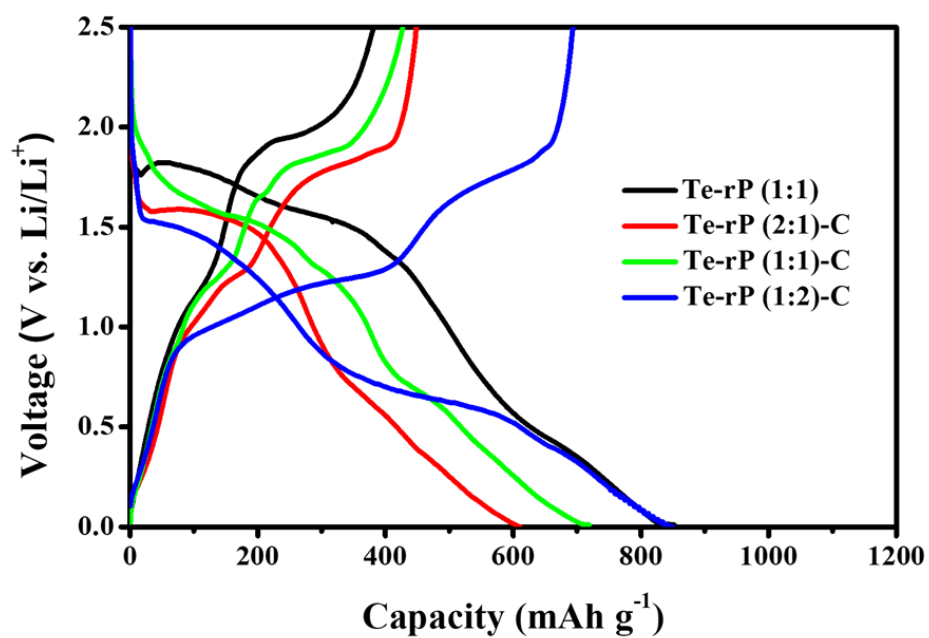

**Figure S3.** Initial voltage profiles of the Te-rP (1:1)-C, Te-rP (2:1)-C, Te-rP (1:1)-C, and Te-rP (1:2)-C at 100 mA g<sup>-1</sup> without the FEC additive.

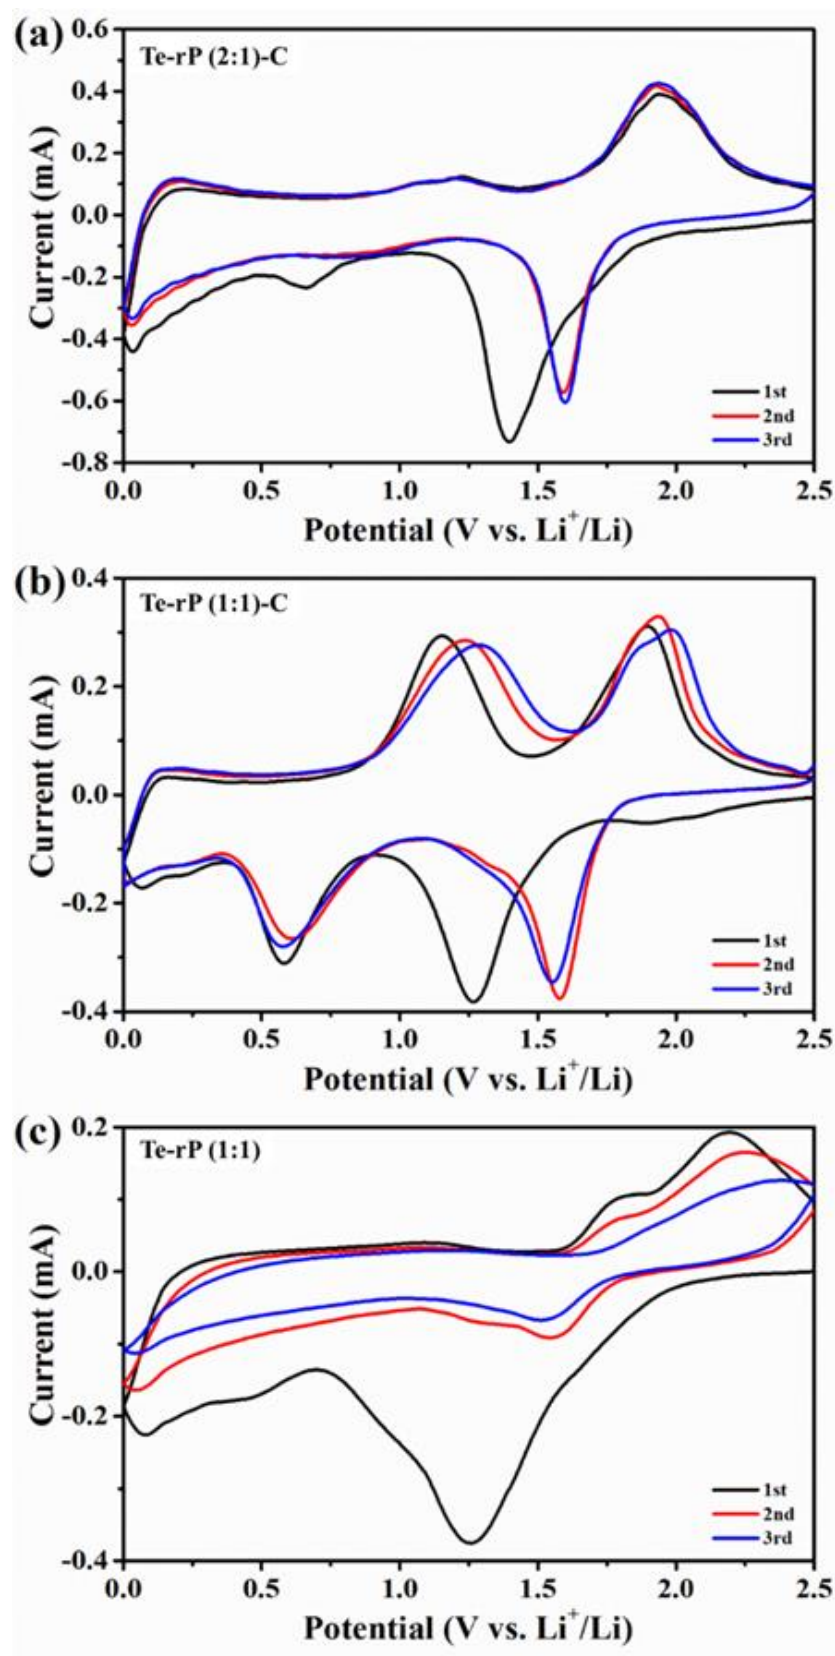

**Figure S4.** Cyclic voltammetry of (a) Te-rP (2:1)-C, (b) Te-rP (1:1)-C, and (c) Te-rP (1:1) electrodes at 0.1 mV s<sup>-1</sup>.

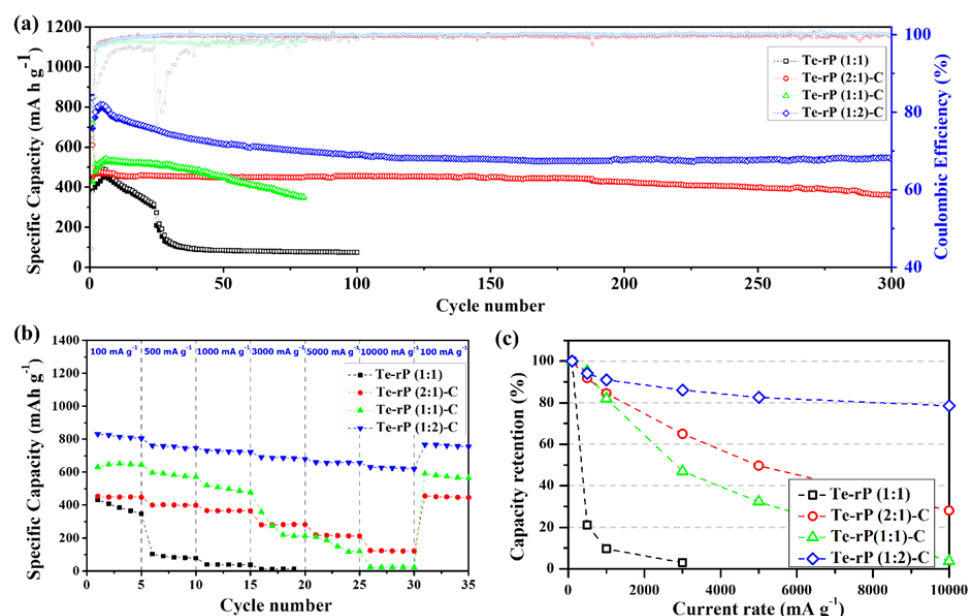

**Figure S5.** (a) Cycling performances of the Te-rP (1:1)-C, Te-rP (2:1)-C, Te-rP (1:1)-C, and Te-rP (1:2)-C without the 5% FEC additive. (b) Rate cyclability and (c) normalized capacity retention values (percent) of as-prepared electrodes without FEC additive.

**Table S1.** EIS data of the Te-rP (2:1)-C, Te-rP (1:1)-C, and Te-rP (1:2)-C electrodes.

| Sample        | $R_s(\Omega)$ | $R_{SEI}(\Omega)$ | $R_{ct}(\Omega)$ | $\alpha$ |
|---------------|---------------|-------------------|------------------|----------|
| Te-rP (2:1)-C | 4.66          | 83.28             | 27.02            | 0.5      |
| Te-rP (1:1)-C | 1.67          | 86.29             | 72.40            | 0.5      |
| Te-rP (1:2)-C | 2.39          | 82.37             | 15.77            | 0.5      |

**Table S2.** Comparison of the electrochemical properties of Te, rP-related composite anodes.

| Materials              | Synthesis method               | Electrolyte                                  | ICE   | Reversible Capacity                                                  | Rate capability                                   | ref        |
|------------------------|--------------------------------|----------------------------------------------|-------|----------------------------------------------------------------------|---------------------------------------------------|------------|
| Te-rP (1:2)-C          | HEBM                           | 1M LiPF <sub>6</sub> in (EC/DEC) with 5% FEC | 80%   | 734 mAh g <sup>-1</sup> at 100 mA g <sup>-1</sup> after 300 cycles   | 600 mAh g <sup>-1</sup> at 10 A g <sup>-1</sup>   | This study |
| Te/C                   | Vacuum-liquid-infusion         | 1M LiPF <sub>6</sub> in (EC/DEC)             | 27.8% | 224 mAh g <sup>-1</sup> at 50 mA g <sup>-1</sup> after 1000 cycles   | 55.1 mAh g <sup>-1</sup> at 4 A g <sup>-1</sup>   | [30]       |
| ZnSe/C                 | HEBM                           | 1M LiPF <sub>6</sub> in (EC/DEC)             | 76%   | 705 mAh g <sup>-1</sup> at 100 mA g <sup>-1</sup> after 300 cycles   | N/A                                               | [53]       |
| CuP <sub>2</sub> -Te-C | HEBM                           | 1M LiPF <sub>6</sub> in (EC/DEC)             | 83.6% | 532 mAh g <sup>-1</sup> at 100 mA g <sup>-1</sup> after 100 cycles   | 501 mAh g <sup>-1</sup> at 3 A g <sup>-1</sup>    | [54]       |
| P/AC                   | Vaporization adsorption        | 1M LiPF <sub>6</sub> in (EC/EMC/DMC)         | 76.1% | 1594 mAh g <sup>-1</sup> at 140 mA g <sup>-1</sup> after 50 cycles   | 730 mAh g <sup>-1</sup> at 1.43 A g <sup>-1</sup> | [55]       |
| P-KB                   | HEBM                           | 1M LiPF <sub>6</sub> in (EC/DEC) with 5% FEC | 76.4% | 1000 mAh g <sup>-1</sup> at 1000 mA g <sup>-1</sup> after 300 cycles | 600 mAh g <sup>-1</sup> at 2.4 A g <sup>-1</sup>  | [56]       |
| DWSiNTs                | double-walled silicon nanotube | 1M LiPF <sub>6</sub> in (EC/DEC)             | 76%   | 1780 mAh g <sup>-1</sup> at 400 mA g <sup>-1</sup> after 200 cycles  | 540 mAh g <sup>-1</sup> at 20 C                   | [57]       |
| GCSi                   | HEBM                           | 1M LiPF <sub>6</sub> in (EC/DEC) with 5% FEC | 83%   | 448 mAh g <sup>-1</sup> at 500 mA g <sup>-1</sup> after 100 cycles   | N/A                                               | [58]       |
